# Supplementary material
Source: PubMed Central journal article supplement (PMC2964194)
Supplement: 1009157107_pnas.201009157SI.pdf [file 1009157107_pnas.201009157SI.pdf]

# Supporting Information

Lund et al. 10.1073/pnas.1009157107

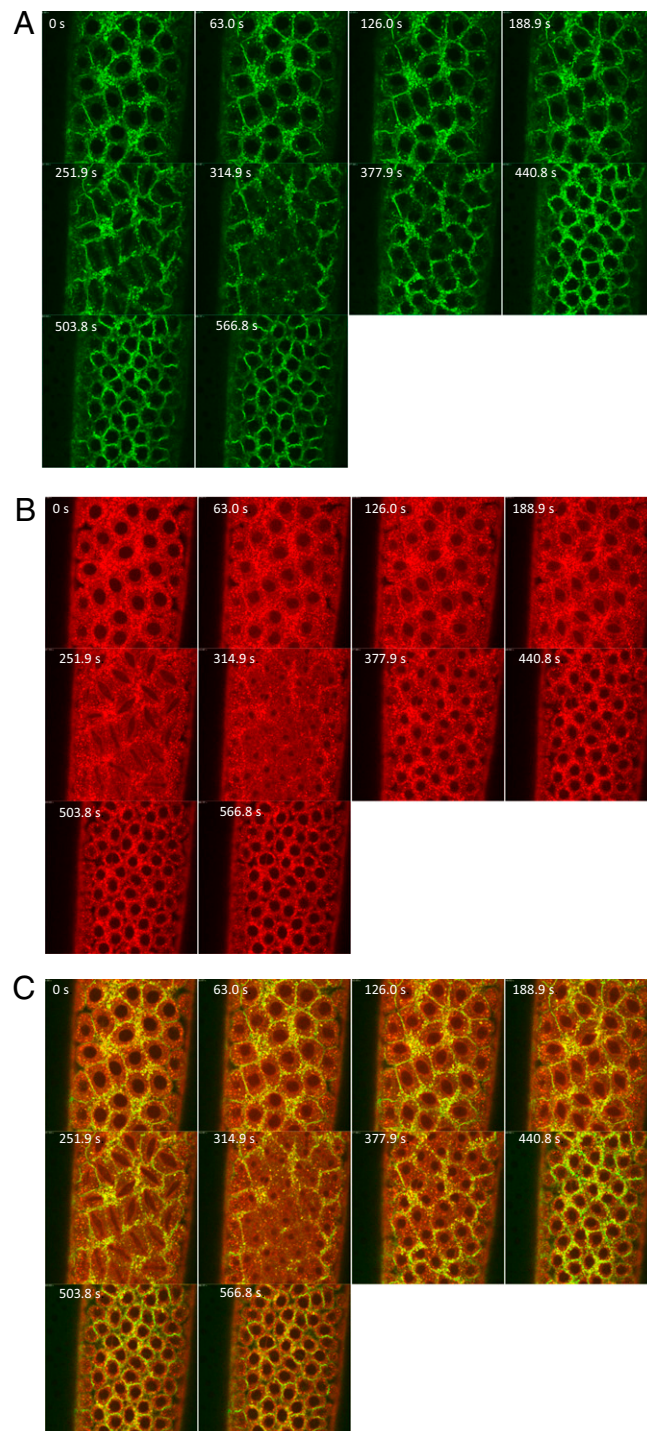

**Fig. S1.** Live imaging time course of embryos simultaneously expressing Toll-GFP and Rab5-mCherry. Toll-GFP (A, green), Rab5-mCherry (B, red), and overlap of Toll and Rab5 (C, yellow). Time in seconds is indicated within each frame. Imaging was conducted at 23 °C.

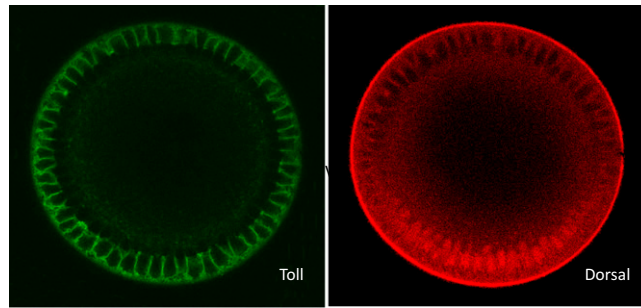

**Fig. S2.** Cross-section live imaging of Toll-GFP and Dorsal-mCherry. Toll-GFP (green) and Dorsal-mCherry (red) at nuclear cycle 14. Vertical is down, and dorsal is up. Both localized plasma membrane and particulate Toll are visible.

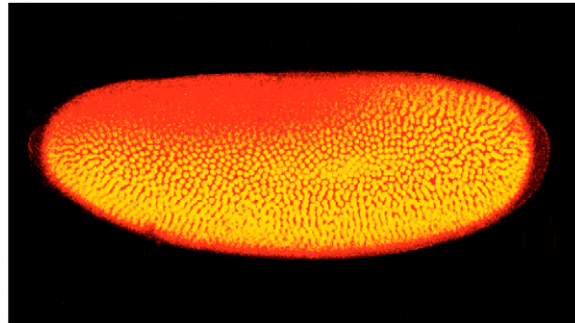

**Fig. S3.** 3D reconstruction from confocal live imaging of the expanded Dorsal-GFP gradient after microinjection of synthetic mRNA encoding constitutively active Rab5Q88L as a bolus on the ventral side at midline.
